# Supplementary material for: Planar tetranuclear lanthanide clusters with the Dy4 analogue displaying slow magnetic relaxation
Source: Royal Society of Chemistry journal article supplement (doi:10.1039/c1dt11750e), 2011-01-01
Supplement: c1dt11750e.pdf [file c1dt11750e.pdf]

## Electronic Supplementary Information (ESI)

### Planar tetranuclear lanthanide clusters with the Dy<sub>4</sub> analogue displaying slow magnetic relaxation

Stuart K. Langley,<sup>a</sup> Nicholas F. Chilton,<sup>a</sup> Ian A. Gass,<sup>a</sup> Boujemaa Moubaraki<sup>a</sup>  
and Keith S. Murray<sup>\*a</sup>

#### Experimental

##### [Gd<sup>III</sup><sub>4</sub>(OH)<sub>2</sub>(*o*-van)<sub>4</sub>(O<sub>2</sub>CC(CH<sub>3</sub>)<sub>3</sub>)<sub>4</sub>(NO<sub>3</sub>)<sub>2</sub>]<sub>2</sub>·CH<sub>2</sub>Cl<sub>2</sub>·1.5H<sub>2</sub>O (**1**)

Gd(NO<sub>3</sub>)<sub>3</sub>·6H<sub>2</sub>O (0.45 g, 1 mmol) was dissolved in MeOH (20 ml) followed by the addition of pivalic acid (0.1 g, 1 mmol), 3-methoxysalicylaldehyde (0.15 g, 1 mmol) and triethylamine (0.3 ml, 2 mmol) to give a light yellow solution. This was stirred for 2 hours, the solvent removed and redissolved in CH<sub>2</sub>Cl<sub>2</sub> (10 ml). This was then layered with Et<sub>2</sub>O and after 1-2 days light yellow crystals of **1** had formed. Yield: 202 mg, 43.1 %. Anal. Calculated (found) for **1**·CH<sub>2</sub>Cl<sub>2</sub>·1.5H<sub>2</sub>O : Gd<sub>4</sub>C<sub>52</sub>H<sub>71</sub>O<sub>29.5</sub>N<sub>2</sub>Cl<sub>2</sub> : C, 33.08 (33.37); H, 3.79 (4.07); N, 1.48 (1.78). Selected IR data ATR (cm<sup>-1</sup>): 3611w, 2954m, 1645s, 1608w, 1561s, 1550sh, 1471s, 1437m, 1416s, 1377m, 1359m, 1299s, 1234m, 1205s, 1170w, 1036w, 948m, 896w, 854w, 816w, 792w, 740m, 723, 672w, 644w.

##### [Dy<sup>III</sup><sub>4</sub>(OH)<sub>2</sub>(*o*-van)<sub>4</sub>(O<sub>2</sub>CC(CH<sub>3</sub>)<sub>3</sub>)<sub>4</sub>(NO<sub>3</sub>)<sub>2</sub>]<sub>2</sub>·CH<sub>2</sub>Cl<sub>2</sub>·1.5H<sub>2</sub>O (**2**)

Dy(NO<sub>3</sub>)<sub>3</sub>·xH<sub>2</sub>O (0.45 g, 1 mmol) was dissolved in MeOH (20 ml) followed by the addition of pivalic acid (0.1 g, 1 mmol), 3-methoxysalicylaldehyde (0.15 g, 1 mmol) and triethylamine (0.3 ml, 2 mmol) to give a light yellow solution. This was stirred for 2 hours, the solvent removed and redissolved in CH<sub>2</sub>Cl<sub>2</sub> (10 ml). This was then layered with Et<sub>2</sub>O and after 1-2 days light yellow crystals of **1** had formed. Yield: 198 mg, 41.2 %. Anal. Calculated (found) for **1**·CH<sub>2</sub>Cl<sub>2</sub>·1.5H<sub>2</sub>O : Dy<sub>4</sub>C<sub>52</sub>H<sub>71</sub>O<sub>29.5</sub>N<sub>2</sub>Cl<sub>2</sub> : C, 32.72 (33.12); H, 3.75 (4.01); N, 1.47 (1.71); Selected IR data ATR (cm<sup>-1</sup>): 3610w, 2954m, 1647s, 1608w, 1563s, 1551sh, 1472s, 1438m, 1418s, 1377m, 1358m, 1302s, 1235m, 1206s, 1171w, 1037w, 949m, 896w, 855w, 815w, 793w, 741m, 724, 680w, 645w.

|                      | <b>1 (Gd<sub>4</sub>)</b> | <b>2 (Dy<sub>4</sub>)</b> |
|----------------------|---------------------------|---------------------------|
| Ln1-O8               | 2.333(3)                  | 2.302(3)                  |
| Ln1-O1               | 2.338(3)                  | 2.318(2)                  |
| Ln1-O10              | 2.377(3)                  | 2.340(3)                  |
| Ln1-O4               | 2.384(3)                  | 2.357(3)                  |
| Ln1-O3               | 2.399(3)                  | 2.382(2)                  |
| Ln1-O6               | 2.491(3)                  | 2.468(3)                  |
| Ln1-O12              | 2.497(3)                  | 2.470(3)                  |
| Ln1-O11              | 2.539(3)                  | 2.537(3)                  |
| Ln1-O5               | 2.556(3)                  | 2.537(3)                  |
| Ln2-O17 <sup>1</sup> | 2.300(3)                  | 2.275(3)                  |
| Ln2-O9               | 2.313(3)                  | 2.290(3)                  |
| Ln2-O3               | 2.366(3)                  | 2.345(3)                  |
| Ln2-O1 <sup>1</sup>  | 2.367(3)                  | 2.335(3)                  |
| Ln2-O1               | 2.401(3)                  | 2.374(2)                  |
| Ln2-O7 <sup>1</sup>  | 2.404(3)                  | 2.380(3)                  |
| Ln2-O6 <sup>1</sup>  | 2.406(3)                  | 2.378(3)                  |
| Ln2-O2               | 2.545(3)                  | 2.539(2)                  |

**Table S1.** Selected bond lengths (Å) for complexes **1** and **2**. Symmetry transformation: (I) 1 - x, 2 - y, - z.

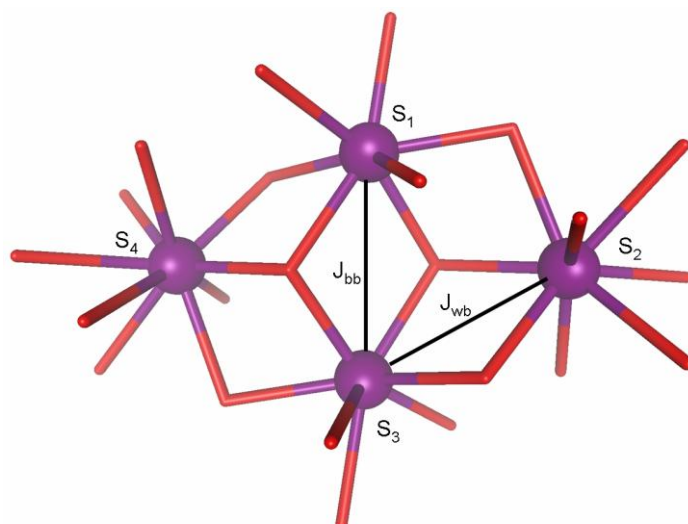

$$H = -2J_{wb}(\mathbf{S}_1 \cdot \mathbf{S}_2 + \mathbf{S}_2 \cdot \mathbf{S}_3 + \mathbf{S}_3 \cdot \mathbf{S}_4 + \mathbf{S}_1 \cdot \mathbf{S}_4) - 2J_{bb} \mathbf{S}_1 \cdot \mathbf{S}_3$$

**Fig. S1** Coupling scheme used for the fit of susceptibilities of complex **1**.

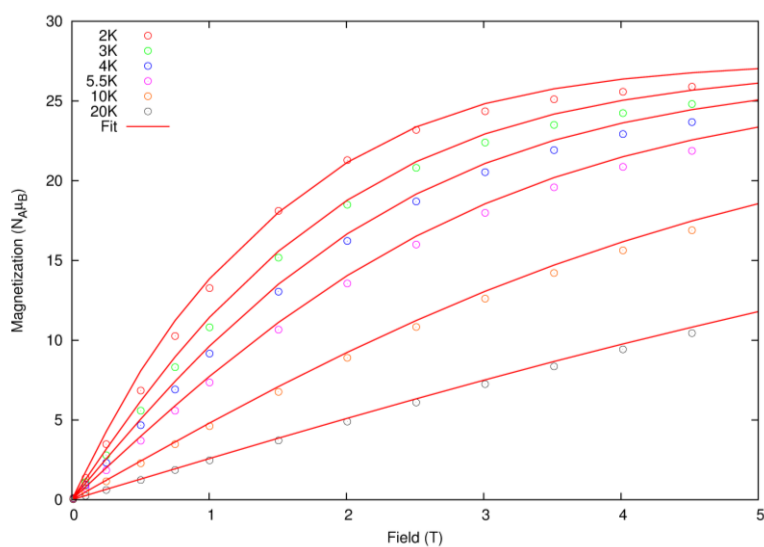

**Fig. S2**  $M$  vs  $H$  isothermal plots for **1** in the 2 (top) – 20 K (bottom) temperature range, the red lines are fits of the data using the parameters described in the text.

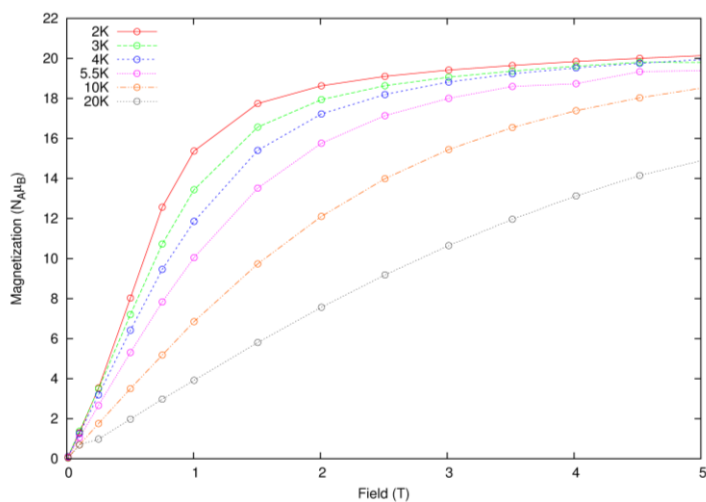

**Fig. S3**  $M$  vs  $H$  isothermal plots for **2** in the 2 (top) – 20 K (bottom) temperature range, the solid and dashed lines are guides for the eye.

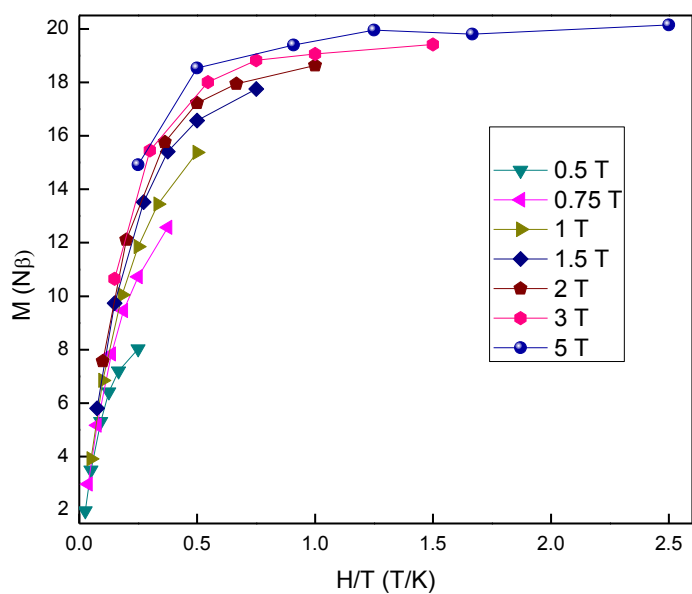

**Fig. S4** Magnetization data for **2**, plotted as reduced magnetization  $M$  vs.  $HT^{-1}$  in the 2 – 20 K temperature range. Solid lines are a guide for the eye.

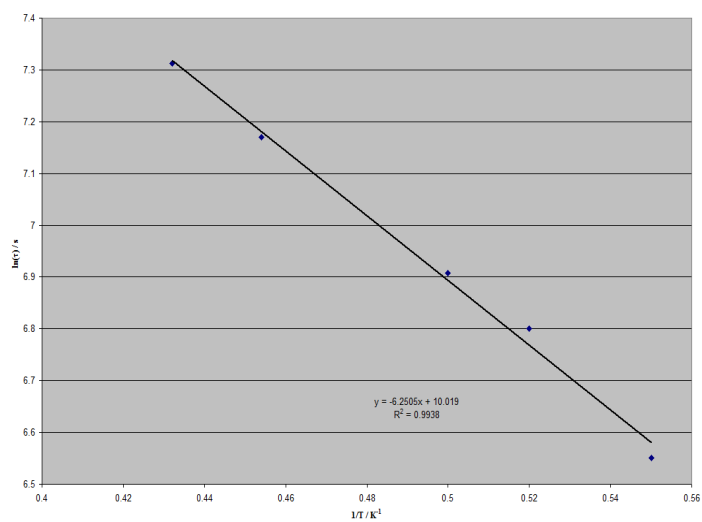

**Fig. S5** Arrhenius plot in zero static field. Line shows the linear fit of the data for **2**.

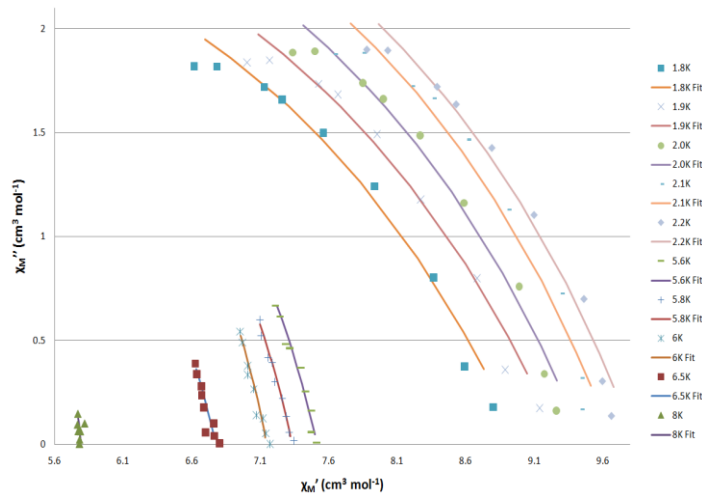

**Fig. S6** Cole-Cole plot taken from zero field measurements for complex **2**.

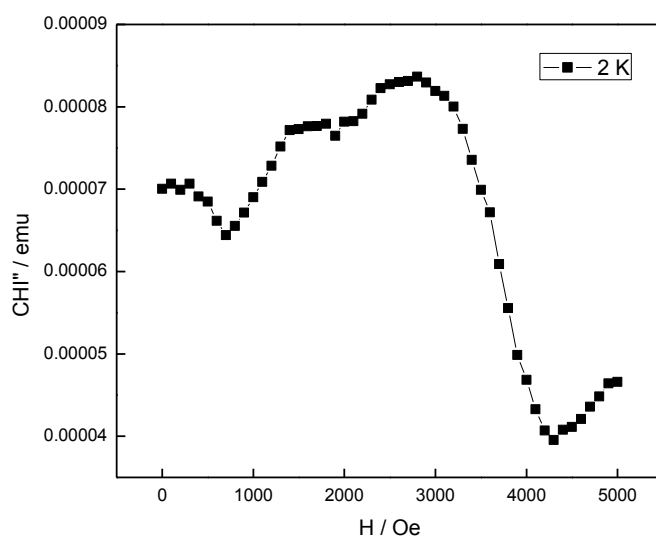

**Fig. S7** Field sweep at constant temperature (2 K) and frequency (1400 Hz) to determine the optimal DC field for **2**.

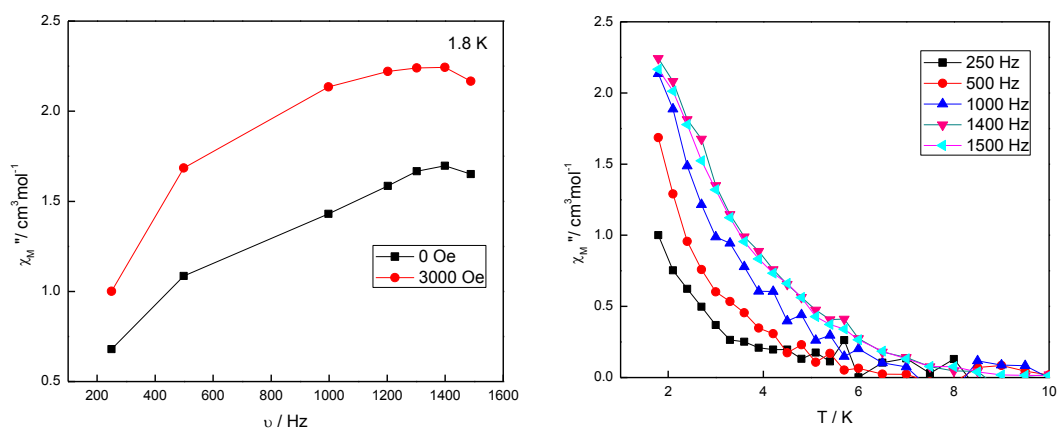

**Fig. S8** (left) Frequency dependence at 1.8 K of the out-of-phase AC susceptibility at 0 and 3000 Oe of **2**. (right) Temperature dependence under an optimal DC field (3000 Oe) of the out-of-phase AC susceptibility at different frequencies of **2**.
